# Supplementary material for: Obesity and Early-Onset Breast Cancer and Specific Molecular Subtype Diagnosis in Black and White Women: NIMHD Social Epigenomics Program
Source: PubMed Central journal article supplement (PMC11287389; doi:10.1001/jamanetworkopen.2024.21846), 2024-07-29
Supplement: jamanetwopen-e2421846-s001.pdf [file jamanetwopen-e2421846-s001.pdf]

## Supplementary Online Content

Sudan SK, Sharma A, Vikramdeo KS, et al. Obesity and risk of early onset and diagnosis of luminal A and triple-negative breast cancer subtypes in Black women: NIMHD Social Epigenomics Program. *JAMA Netw Open*. 2024;7(7):e2421846.  
doi:10.1001/jamanetworkopen.2024.21846

**eFigure.** Correlation Between Serum Leptin Levels and BMI

**eTable 1.** Details of Counties and States of Retrospective Cohort (2017-2022)

**eTable 2.** Characteristics of Prospectively Enrolled Patients

**eTable 3.** Serum Levels of Leptin in BC and Non-BC Patients

This supplementary material has been provided by the authors to give readers additional information about their work.

**eFigure 1. Correlation between serum leptin levels and BMI.**

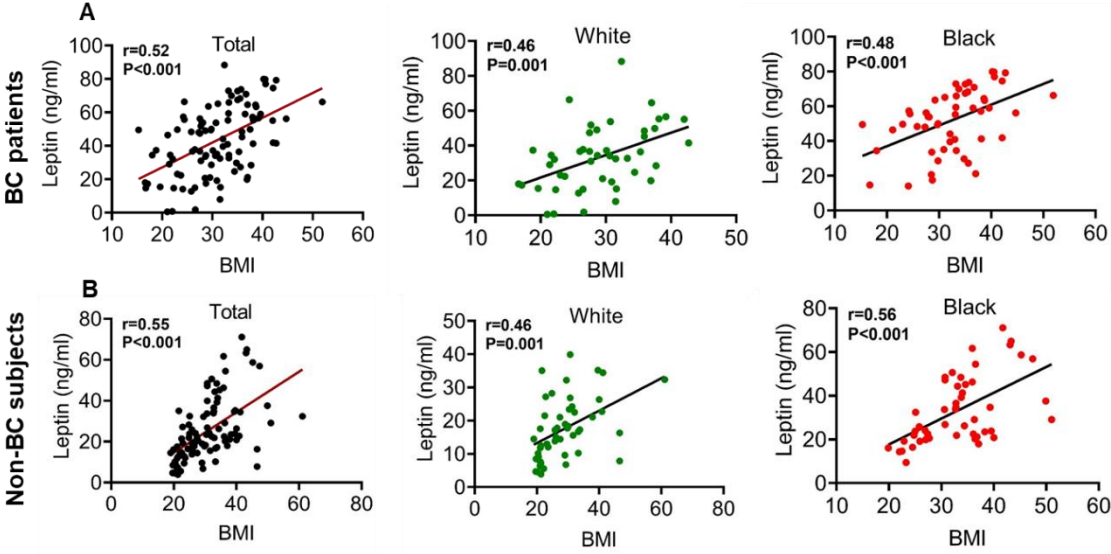

(A) Correlation between serum leptin and BMI of total, White, and Black BC and (B) non-BC subjects (P value=Pearson correlation).

**eTable 1: Details of counties and states of retrospective cohort (2017-2022)**

| <b>County</b> | <b>State</b> | <b>Number of patients, No (%)</b> |
|---------------|--------------|-----------------------------------|
| Baldwin       | AL           | 341 (31.43)                       |
| Cameron       | LA           | 1 (0.09)                          |
| Cherokee      | GA           | 1 (0.09)                          |
| Choctaw       | AL           | 7 (0.65)                          |
| Clarke        | AL           | 38 (3.50)                         |
| Clarke        | MS           | 1 (0.09)                          |
| Coffee        | AL           | 1 (0.09)                          |
| Covington     | AL           | 3 (0.28)                          |
| Dale          | AL           | 1 (0.09)                          |
| Dallas        | AL           | 1 (0.09)                          |
| Escambia      | AL           | 17 (1.57)                         |
| Escambia      | FL           | 1 (0.09)                          |
| Forrest       | MS           | 1 (0.09)                          |
| George        | MS           | 16 (1.47)                         |
| Greenville    | SC           | 1 (0.09)                          |
| Gwinnett      | GA           | 1 (0.09)                          |
| Harrison      | MS           | 14 (1.29)                         |
| Howell        | MO           | 1 (0.09)                          |
| Jackson       | MS           | 38 (3.50)                         |
| Jefferson     | AL           | 1 (0.09)                          |
| Jones         | MS           | 2 (0.18)                          |
| Lauderdale    | MS           | 2 (0.18)                          |
| Lee           | AL           | 1 (0.09)                          |
| Marengo       | AL           | 2 (0.18)                          |
| Mobile        | AL           | 542 (49.95)                       |
| Monroe        | AL           | 9 (0.83)                          |
| Morgan        | GA           | 1 (0.09)                          |
| Nash          | NC           | 1 (0.09)                          |
| Okaloosa      | FL           | 5 (0.46)                          |
| Ottawa        | MI           | 1 (0.09)                          |
| Saint Joseph  | MI           | 1 (0.09)                          |
| Santa Rosa    | FL           | 3 (0.28)                          |
| Stone         | MS           | 3 (0.28)                          |
| Washington    | AL           | 20 (1.84)                         |
| Washington    | FL           | 1 (0.09)                          |
| Wayne         | MS           | 1 (0.09)                          |
| Whatcom       | WA           | 2 (0.18)                          |
| Wilcox        | AL           | 2 (0.18)                          |
| <b>Total</b>  |              | 1085                              |

**eTable2. Characteristics of prospective enrolled patients**

|                |                    | Number of patients, No. (%) |         |                |         |
|----------------|--------------------|-----------------------------|---------|----------------|---------|
|                |                    | BC (n=99)                   |         | Non-BC (n=100) |         |
| Characteristic |                    |                             |         |                |         |
| Race           |                    | Black                       | White   | Black          | White   |
|                |                    | 53 (54)                     | 46 (46) | 50 (50)        | 50 (50) |
| Age            | Median (y)         | 56                          | 60      | 36             | 32      |
| BMI            | Normal weight (NW) | 8 (15)                      | 13 (28) | 7 (14)         | 21 (42) |
|                | Over weight (OW)   | 12 (23)                     | 12 (26) | 8 (16)         | 11 (22) |
|                | Obese (Ob)         | 33 (62)                     | 21 (46) | 34 (68)        | 18 (36) |
|                | Missing            | 0                           | 0       | 1 (2)          | 0       |
| Subtype        | Luminal-A          | 29 (55)                     | 33 (72) | NA             |         |
|                | Luminal-B          | 2 (4)                       | 4 (9)   | NA             |         |
|                | HER2-enriched      | 5 (9)                       | 3 (6)   | NA             |         |
|                | TNBC               | 16 (30)                     | 6 (13)  | NA             |         |
|                | Missing            | 1 (2)                       | 0       | NA             |         |

Abbreviations: BC, Breast Cancer; BMI, body mass index (calculated as weight in kilograms divided by height in meters squared); y, years; TNBC, triple-negative breast cancer

**eTable3: Serum levels of leptin in BC and non-BC patients**

| Leptin (ng/ml)  |                |              |               |                 |
|-----------------|----------------|--------------|---------------|-----------------|
|                 |                | Black        | White         | <i>P</i> value  |
| BC patients     | Range (median) | 14-80 (55.3) | 0.5-89 (33.4) | <i>P</i> <0.001 |
|                 | IQR            | 40.3-66.2    | 18.9-47.7     |                 |
| Non-BC patients | Range (median) | 9-72 (29.1)  | 3.5-40 (16.5) | <i>P</i> <0.001 |
|                 | IQR            | 21.1-46.5    | 10.0-22.9     |                 |
