# Supplementary material for: Obesity and Early-Onset Breast Cancer and Specific Molecular Subtype Diagnosis in Black and White Women: NIMHD Social Epigenomics Program
Source: PubMed Central journal article supplement (PMC11287389; doi:10.1001/jamanetworkopen.2024.21846), 2024-07-29
Supplement: jamanetwopen-e2421846-s002.pdf [file jamanetwopen-e2421846-s002.pdf]

## Data Sharing Statement

Sudan. Obesity and Risk of Early Onset and Diagnosis of Luminal A and Triple-Negative Breast Cancer Subtypes in Black Women. *JAMA Netw Open*. Published July 29, 2024.  
doi:10.1001/jamanetworkopen.2024.21846

### Data

**Data available:** Yes

**Data types:** Deidentified participant data

**How to access data:** [seemasingh@southalabama.edu](mailto:seemasingh@southalabama.edu)

**When available:** With publication

### Supporting Documents

**Document types:** None

### Additional Information

**Who can access the data:** Researchers whose proposed use of the data has been approved

**Types of analyses:** For specified purpose

**Mechanisms of data availability:** With investigator support, after approval of a proposal, and with a signed data access agreement

**Any additional restrictions:** None
